# Supplementary material for: Lower temperatures reduce type I interferon activity and promote alphaviral arthritis
Source: PubMed Central journal article supplement (PMC5770078; doi:10.1371/journal.ppat.1006788), 2017-12-27
Supplement: ppat.1006788.s002.pdf [file ppat.1006788.s002.pdf]

## S2 Fig.

**A**

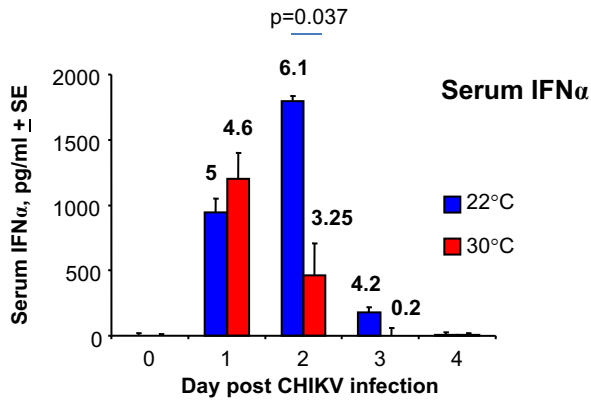

**B**

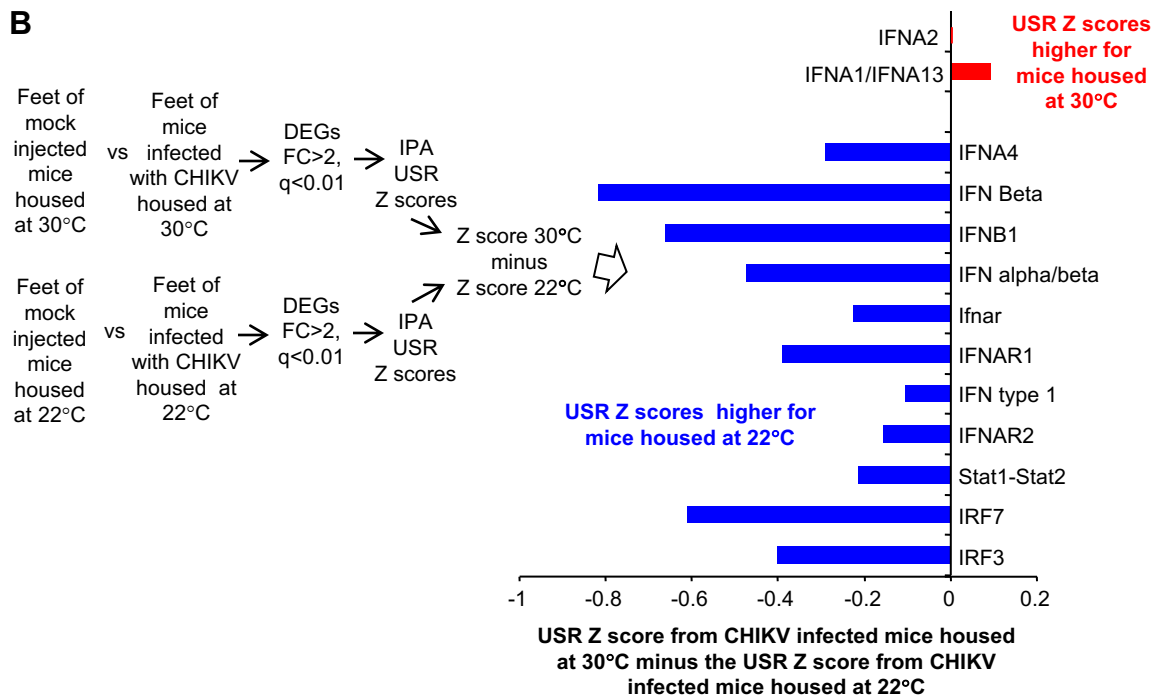

**C**

### IPA Top Diseases and Bio Functions p value range

|                       | CHIKV infection at 30°C | CHIKV infection at 22°C |
|-----------------------|-------------------------|-------------------------|
| Cellular Movement     | 3.49E-10 - 1.92E-46     | 1.83E-13 - 5.93E-62     |
| Immunological Disease | 1.62E-10 - 3.07E-47     | 1.88E-13 - 4.26E-76     |
