# Supplementary material for: Lower temperatures reduce type I interferon activity and promote alphaviral arthritis
Source: PubMed Central journal article supplement (PMC5770078; doi:10.1371/journal.ppat.1006788), 2017-12-27

# S3 Fig.

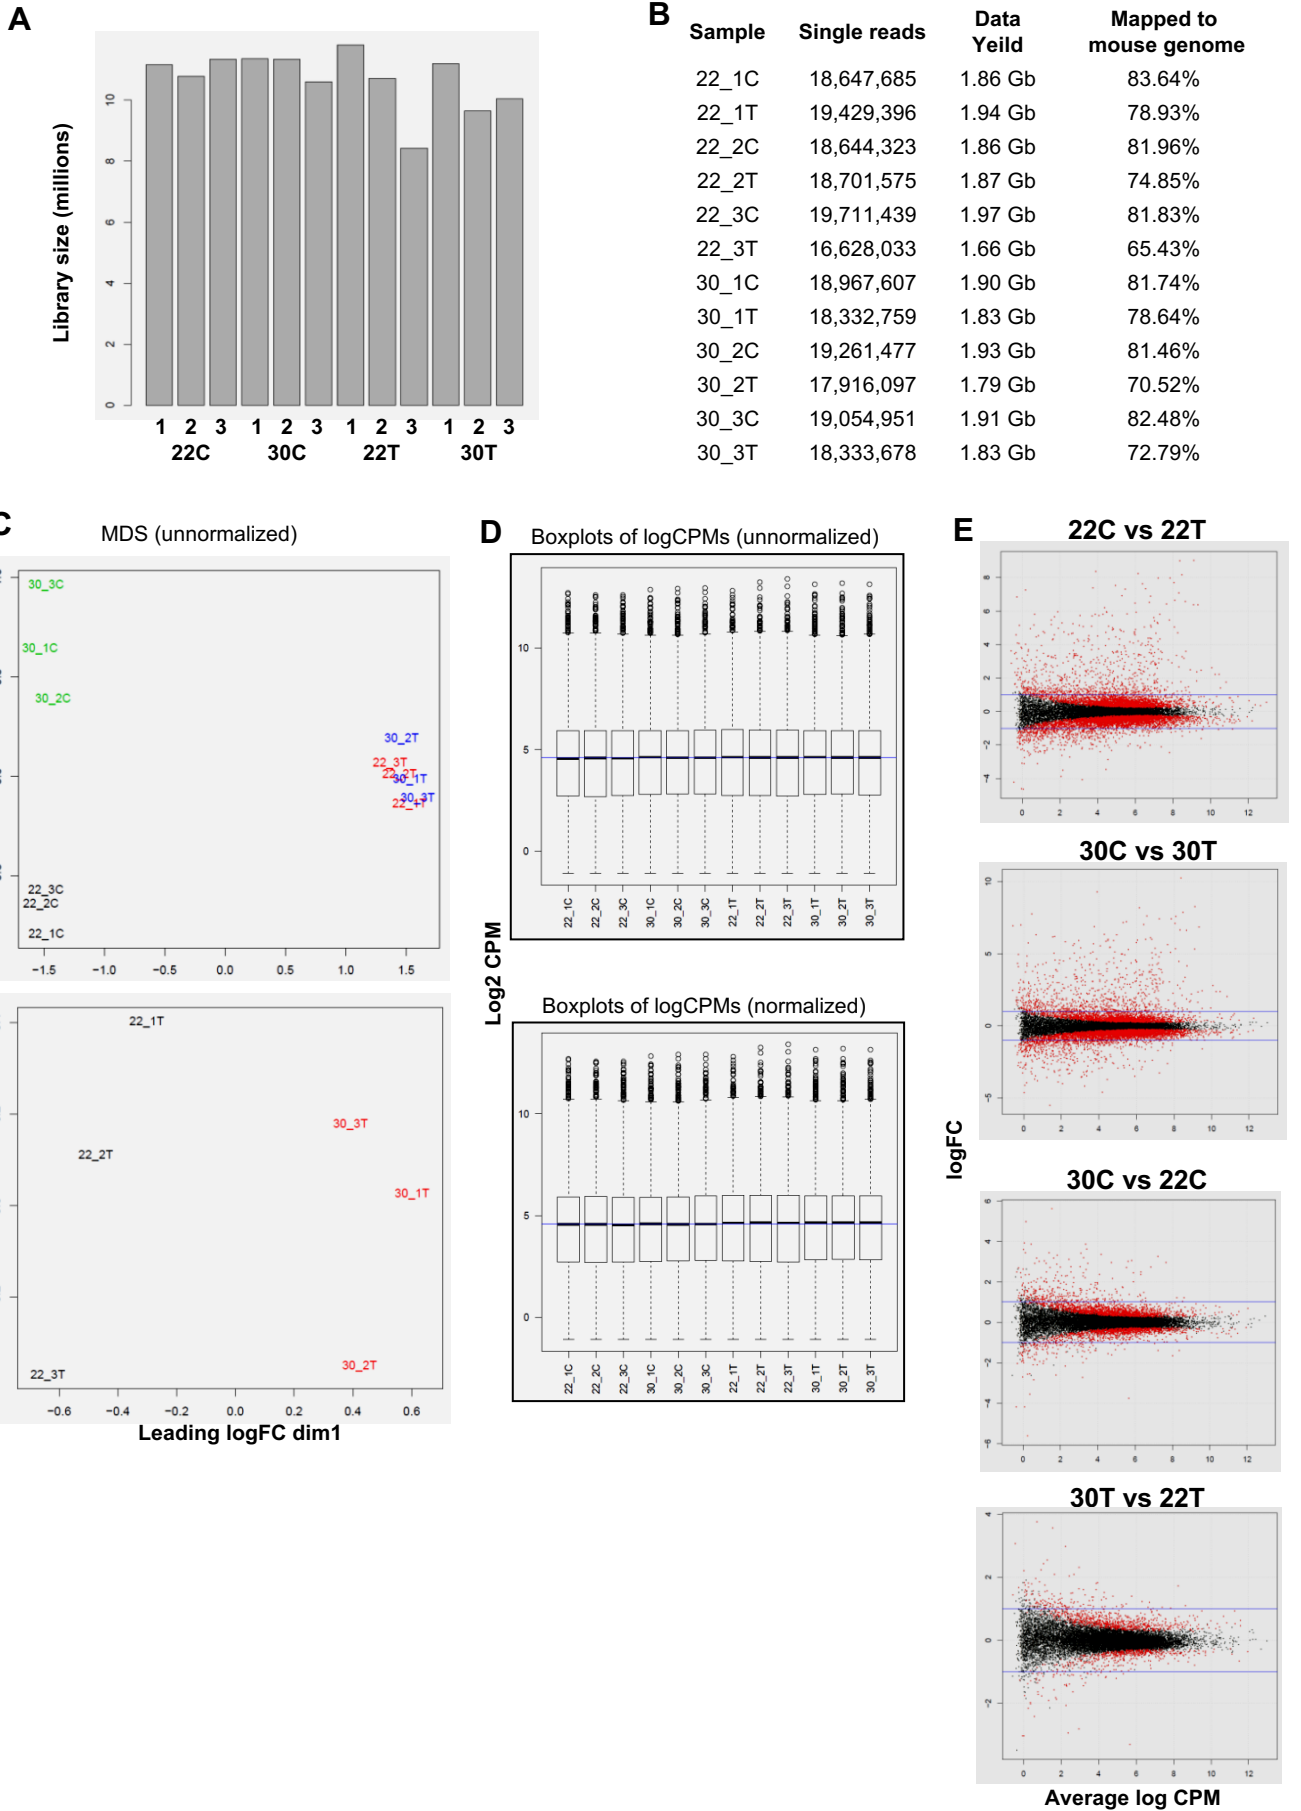

Supplement: ppat.1006788.s003.pdf [file ppat.1006788.s003.pdf]
