# Supplementary material for: Lower temperatures reduce type I interferon activity and promote alphaviral arthritis
Source: PubMed Central journal article supplement (PMC5770078; doi:10.1371/journal.ppat.1006788), 2017-12-27

# S4 Fig.

## Up regulated genes

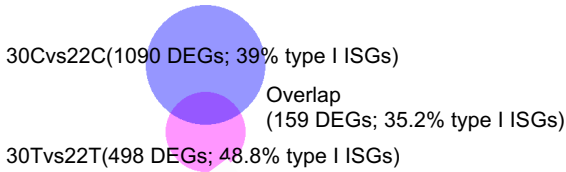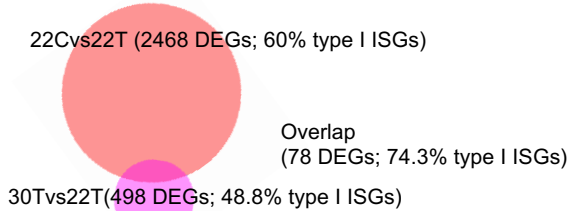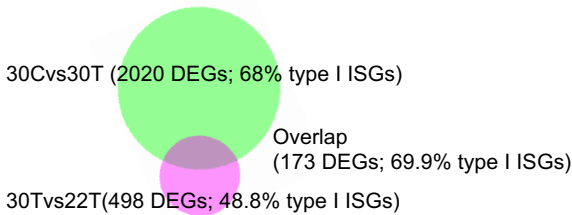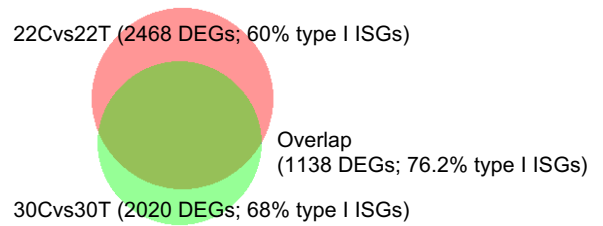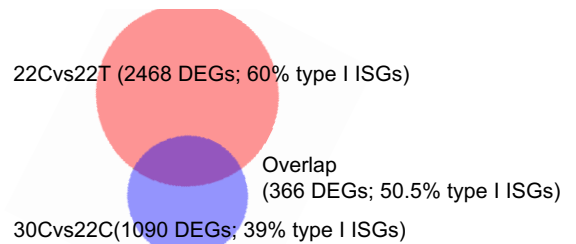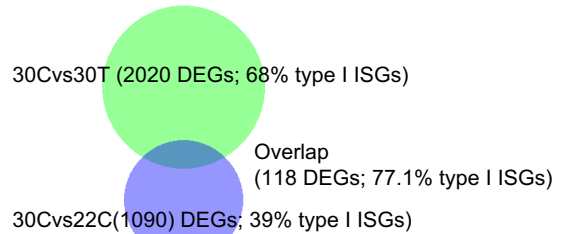

## Down regulated genes

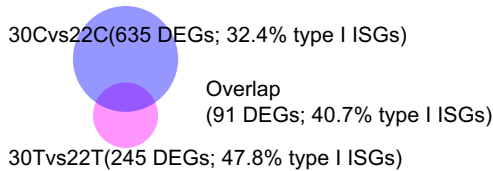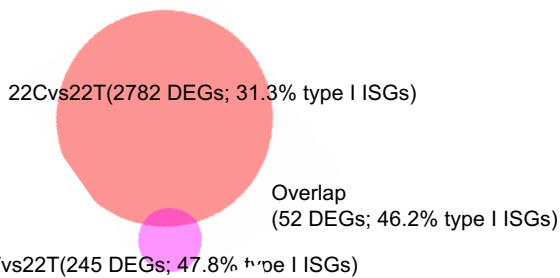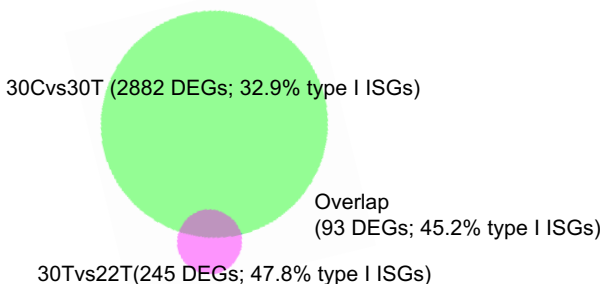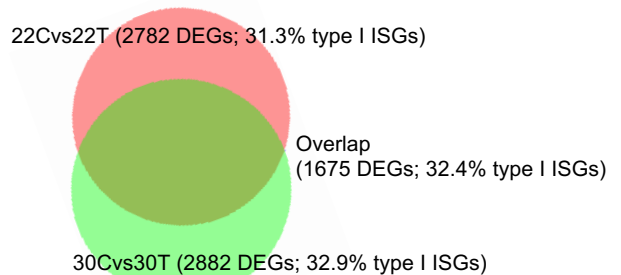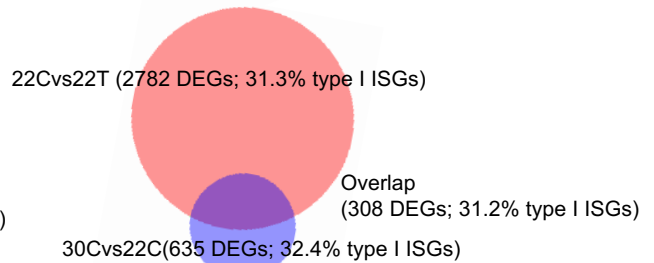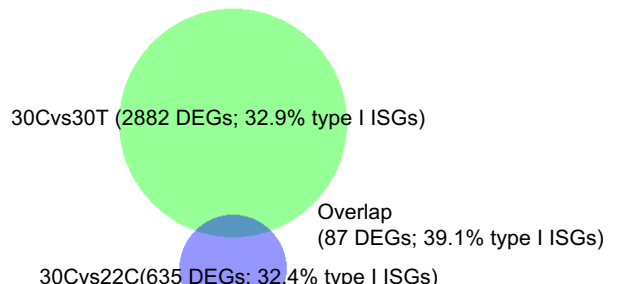

Supplement: ppat.1006788.s004.pdf [file ppat.1006788.s004.pdf]
