# Supplementary material for: Lower temperatures reduce type I interferon activity and promote alphaviral arthritis
Source: PubMed Central journal article supplement (PMC5770078; doi:10.1371/journal.ppat.1006788), 2017-12-27

# S5 Fig.

**A** Up-regulated DEGs from Mock vs CHIKV infection (22°C day 2)  
vs  
Up-regulated DEGs from Mock (22°C) vs poly(I:C)/jetPEI (22T)

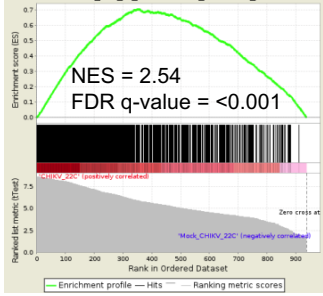

22°C  
Up

Up-regulated DEGs from Mock (22C) vs poly(I:C)/jetPEI (22T)  
vs  
Up-regulated DEGs from Mock vs CHIKV infection (22°C day 2)

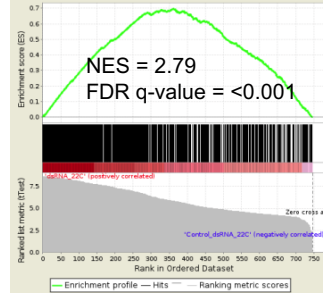

Down-regulated DEGs from Mock vs CHIKV infection (22°C day 2)  
vs  
Down-regulated DEGs from Mock (22C) vs poly(I:C)/jetPEI (22T)

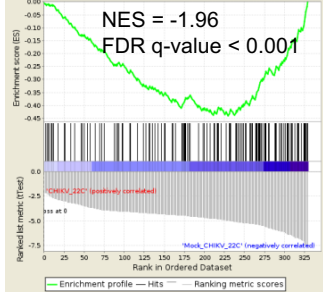

22°C  
Down

Down-regulated DEGs from Mock (22C) vs poly(I:C)/jetPEI (22T)  
vs  
Down-regulated DEGs from Mock vs CHIKV infection (22°C day 2)

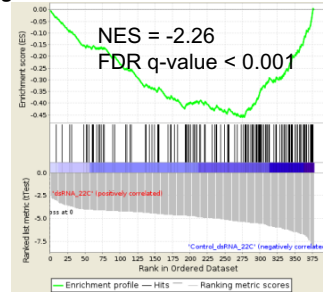

Up-regulated DEGs from Mock vs CHIKV infection (30°C day 2)  
vs  
Up-regulated DEGs from Mock (30C) vs poly(I:C)/jetPEI (30T)

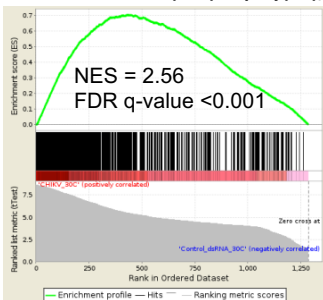

30°C  
Up

Up-regulated DEGs from Mock (30C) vs poly(I:C)/jetPEI (30T)  
vs  
Up-regulated DEGs from Mock vs CHIKV infection (30°C day 2)

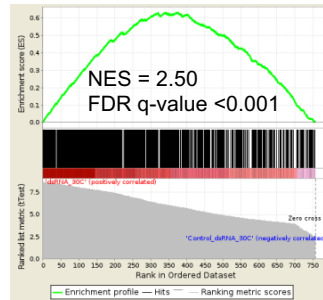

Down-regulated DEGs from Mock vs CHIKV infection (30°C day 2)  
vs  
Down-regulated DEGs from Mock (30C) vs poly(I:C)/jetPEI (30T)

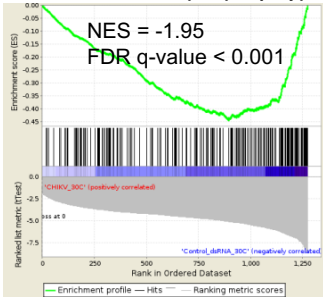

30°C  
Down

Down-regulated DEGs from Mock (30C) vs poly(I:C)/jetPEI (30T)  
vs  
Down-regulated DEGs from Mock vs CHIKV infection (30°C day 2)

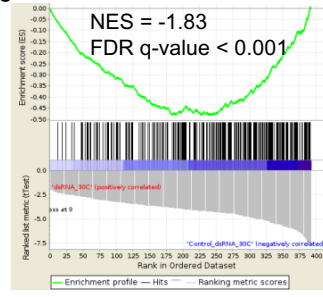

## B

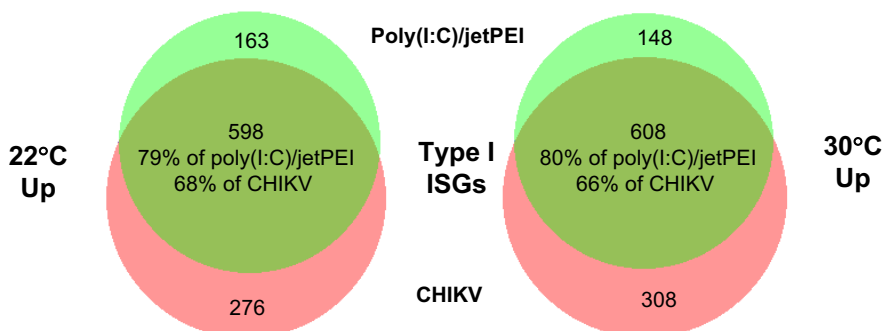

Supplement: ppat.1006788.s005.pdf [file ppat.1006788.s005.pdf]
