# Supplementary material for: Lower temperatures reduce type I interferon activity and promote alphaviral arthritis
Source: PubMed Central journal article supplement (PMC5770078; doi:10.1371/journal.ppat.1006788), 2017-12-27
Supplement: ppat.1006788.s007.pdf [file ppat.1006788.s007.pdf]

**S7 Fig.**

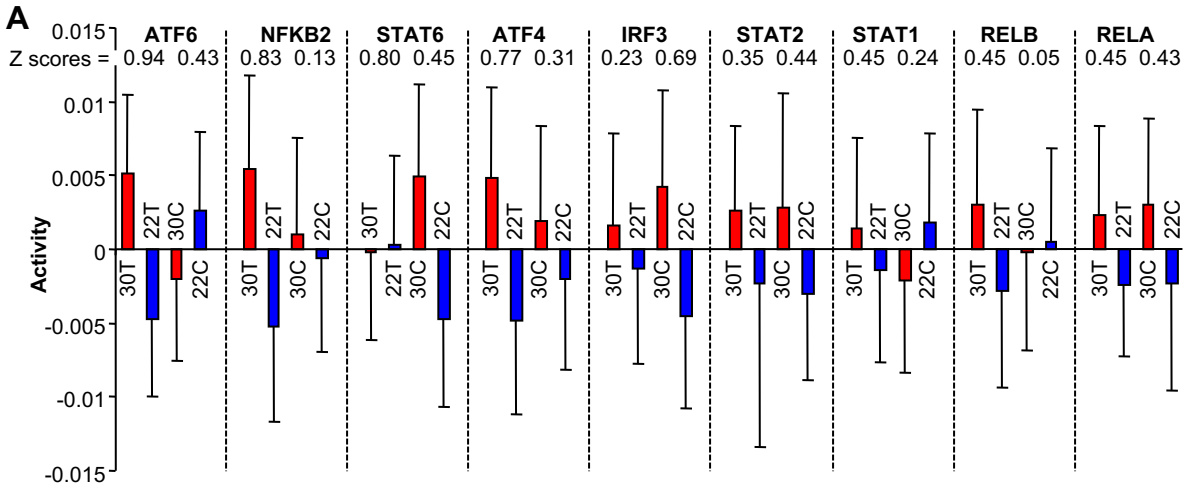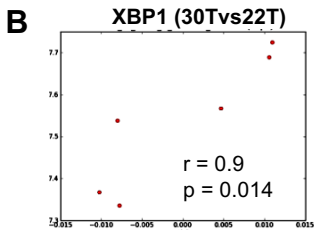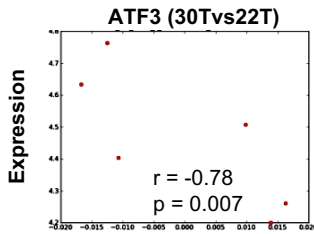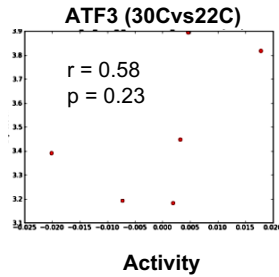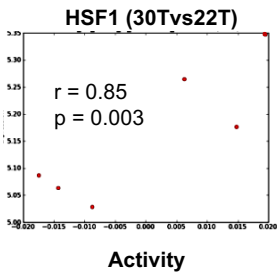

**C**

|               |           |          |
|---------------|-----------|----------|
| 3930402G23Rik | Eif4a2    | P4ha1    |
| 4930435H24Rik | Ewsr1     | Pald1    |
| 4930447M23Rik | Fam173b   | Papola   |
| 4930505K14Rik | Fam19a5   | Pea15a   |
| 5430402E10Rik | Fkbp4     | Pkig     |
| 5730422E09Rik | Flt4      | Pknx1    |
| 6430573F11Rik | Gli2      | Pnck     |
| AB041803      | Gm14744   | Ppid     |
| Abcc5         | Gm16368   | Psmd10   |
| Abhd3         | Gm16519   | Rab39    |
| Acot7         | Gm2056    | Ran      |
| Ahcy12        | Gm26608   | Ranbp6   |
| Ankrd61       | Gm6297    | Rftn1    |
| Arhgdib       | H2-Q10    | Rhpn1    |
| Armc12        | Herc3     | Rtn1     |
| Asb15         | Hnrnpa2b1 | Rtp3     |
| Asb2          | Hsp90aa1  | Sec1     |
| Atp2c1        | Hsp90ab1  | Serpinh1 |
| Bfsp2         | Hspa8     | Setx     |
| Capn3         | Hspb1     | Slc25a38 |
| Ccdc90b       | Hspd1     | Spn      |
| Ccm2          | Hspe1     | Spo11    |
| Ccnd3         | Hsph1     | St13     |
| Ccr2          | Impg1     | Stip1    |
| Cdc42bpa      | Jarid2    | Tenm3    |
| Chordc1       | Jmjd6     | Tex2     |
| Cit           | Klk1b26   | Timp3    |
| Crnn          | I7Rn6     | Trem12   |
| Cryab         | Lenep     | Tll10    |
| D730045B01Rik | Mpo       | Ubf1     |
| Dnaja1        | Mras      | Unc45b   |
| Dnajb6        | Nnat      | Vti1b    |
| Dnd1          | Nudc      | Wfdc18   |
| Drc1          | Oaz1      | Xpnpep3  |
|               |           | Zfand2a  |
