# Supplementary material for: Lower temperatures reduce type I interferon activity and promote alphaviral arthritis
Source: PubMed Central journal article supplement (PMC5770078; doi:10.1371/journal.ppat.1006788), 2017-12-27

**S8 Fig.**

**A**

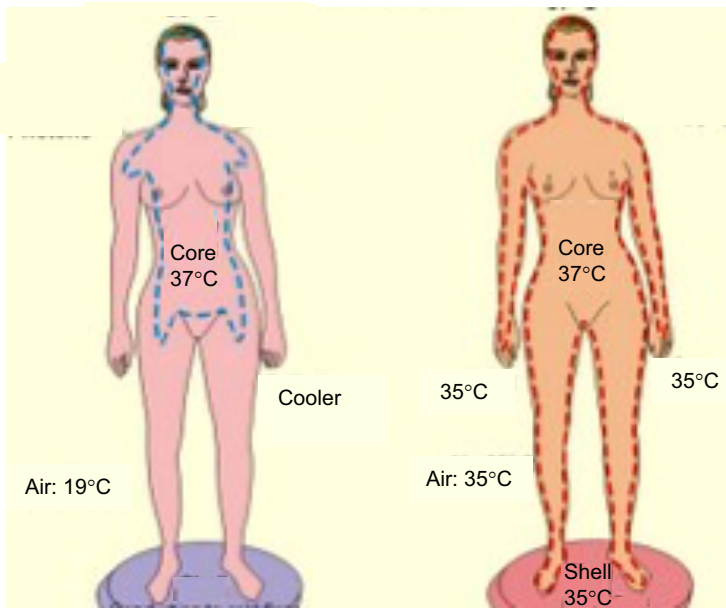

**B CHIKV arthropathy** n %

|                            |            |
|----------------------------|------------|
| All cases                  | 151 (96.1) |
| Symmetrical                | 52 (73.2)  |
| Ankle                      | 100 (66.2) |
| Knee                       | 92 (60.9)  |
| Metacarpophalangeal joints | 75 (49.6)  |
| Metatarsal joints          | 62 (41)    |
| Shoulder                   | 55 (36.4)  |
| Rachis                     | 52 (34.4)  |
| Elbow                      | 48 (31.7)  |
| Wrist                      | 44 (29.1)  |
| Sternoclavicular joints    | 24 (15)    |
| Hip                        | 11 (7.2)   |
| <b>Swollen joints</b>      |            |
| All cases                  | 50 (31.8)  |
| Ankle                      | 35 (70.0)  |
| Metacarpophalangeal joints | 19 (38.0)  |
| Metatarsal joints          | 16 (32.0)  |
| Wrist                      | 10 (20.0)  |

**C Ross River virus arthropathy**

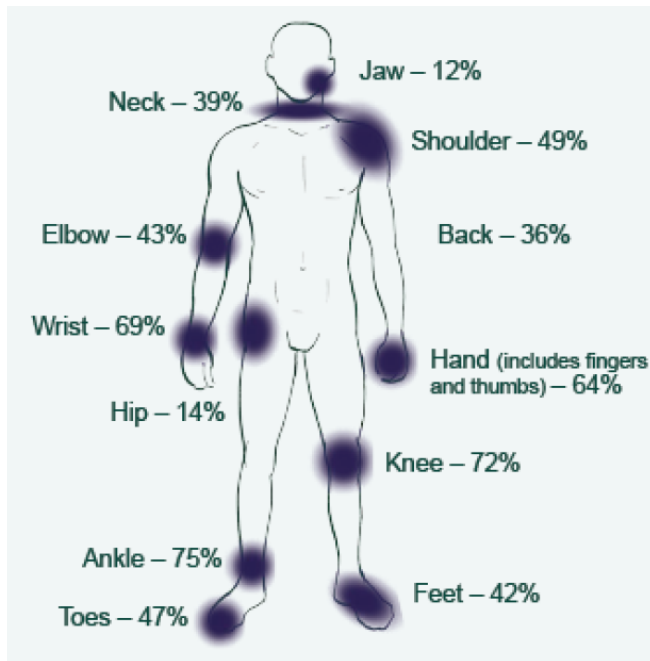

**D Mayaro virus arthropathy**

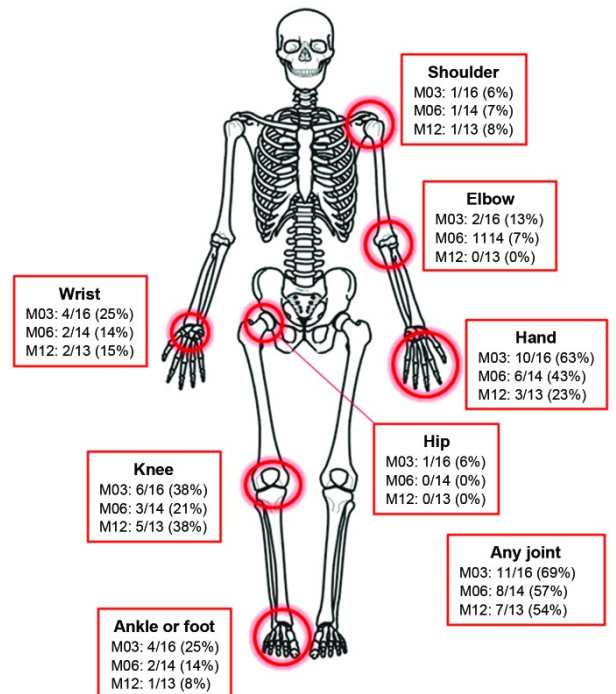

Supplement: ppat.1006788.s008.pdf [file ppat.1006788.s008.pdf]
