# Supplementary material for: Lower temperatures reduce type I interferon activity and promote alphaviral arthritis
Source: PubMed Central journal article supplement (PMC5770078; doi:10.1371/journal.ppat.1006788), 2017-12-27

**S10 Fig.**

**A**

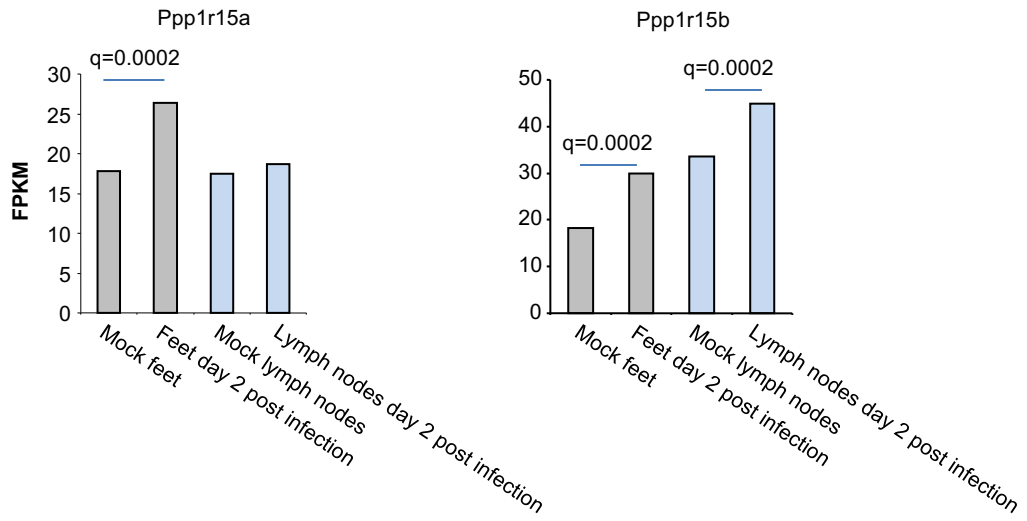

**B**

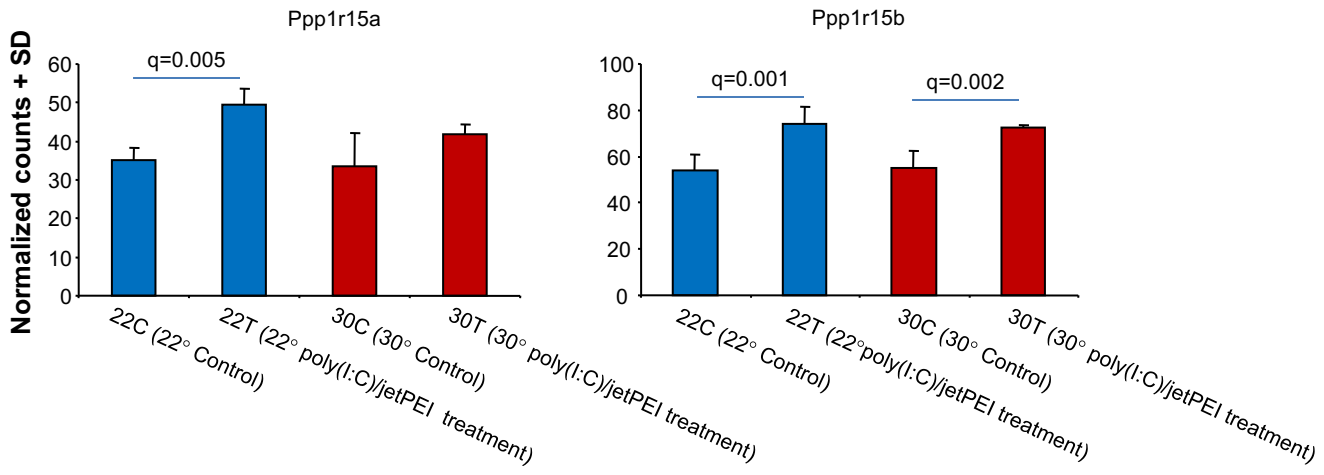

Supplement: ppat.1006788.s010.pdf [file ppat.1006788.s010.pdf]
